# Supplementary material for: MSCs Deliver Hypoxia‐Treated Mitochondria Reprogramming Acinar Metabolism to Alleviate Severe Acute Pancreatitis Injury
Source: PubMed Central journal article supplement (PMC10477874; doi:10.1002/advs.202207691), 2023-07-06
Supplement: ADVS-10-2207691-s001.pdf [file ADVS-10-2207691-s001.pdf]

## Supporting Information

for *Adv. Sci.*, DOI 10.1002/adv.202207691

MSCs Deliver Hypoxia-Treated Mitochondria Reprogramming Acinar Metabolism to Alleviate Severe Acute Pancreatitis Injury

*Zhengyu Hu, Dongyan Wang, Jian Gong, Yan Li, Zhilong Ma, Tingyi Luo, Xuyang Jia, Yihai Shi\* and Zhenshun Song\**

**Cargocytes deliver hypoxia-treated mitochondria reprogramming  
acinar metabolism to alleviate severe acute pancreatitis injury**

Zhengyu Hu<sup>#</sup>, Dongyan Wang<sup>#</sup>, Jian Gong<sup>#</sup>, Yan Li, Zhilong Ma, Tingyi Luo, Xuyang Jia, Yihai Shi<sup>\*</sup>, Zhenshun Song<sup>\*</sup>

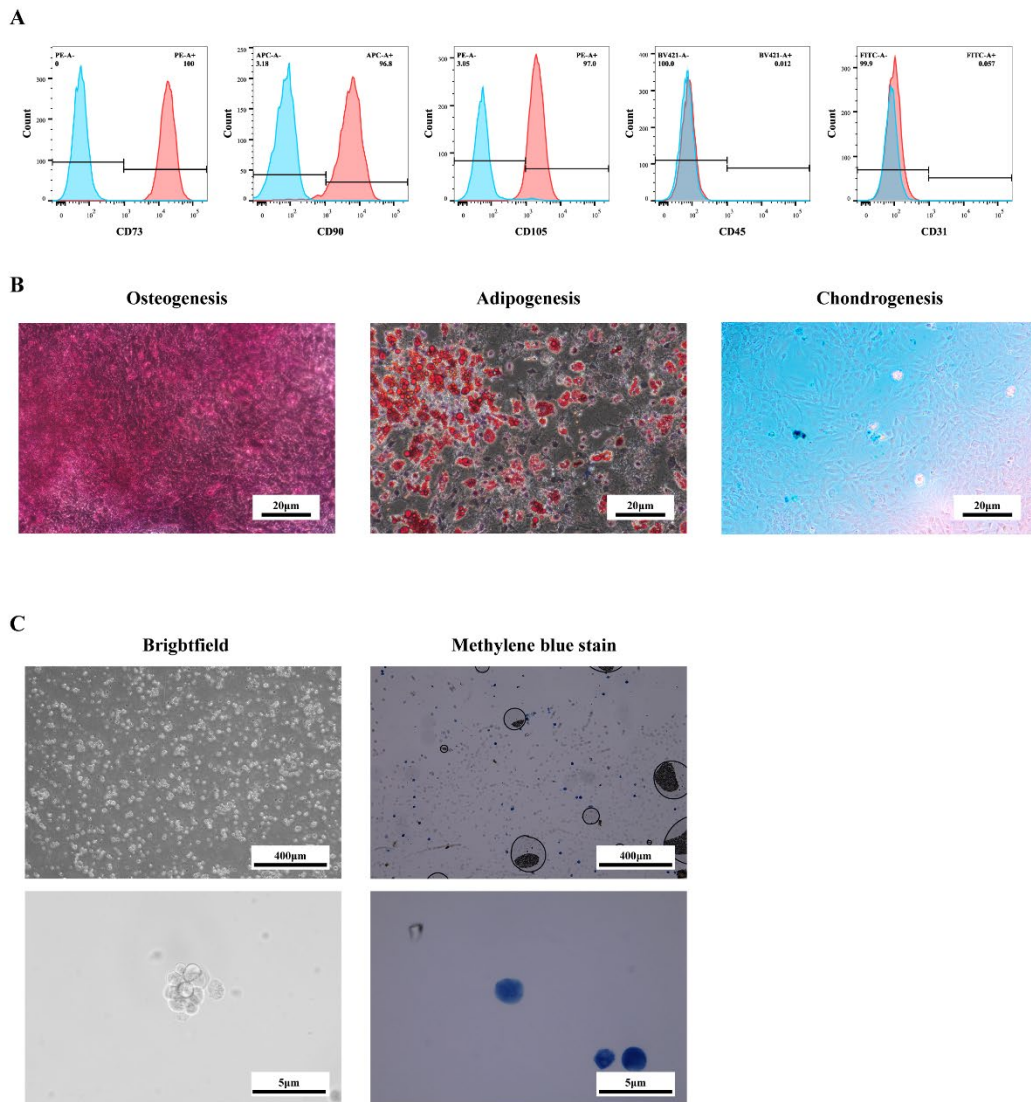

**Figure S1. Identification of primary cells.** A) Flow cytometry analysis of P3 Generation UC-MSCs. Red ridges represent isotype controls. B) Representative images of osteogenic (left panel), lipogenic (middle panel) and chondrogenic (right panel) differentiation of UC-MSCs. C) Representative images of bright field and methylene blue staining of primary rPACs.

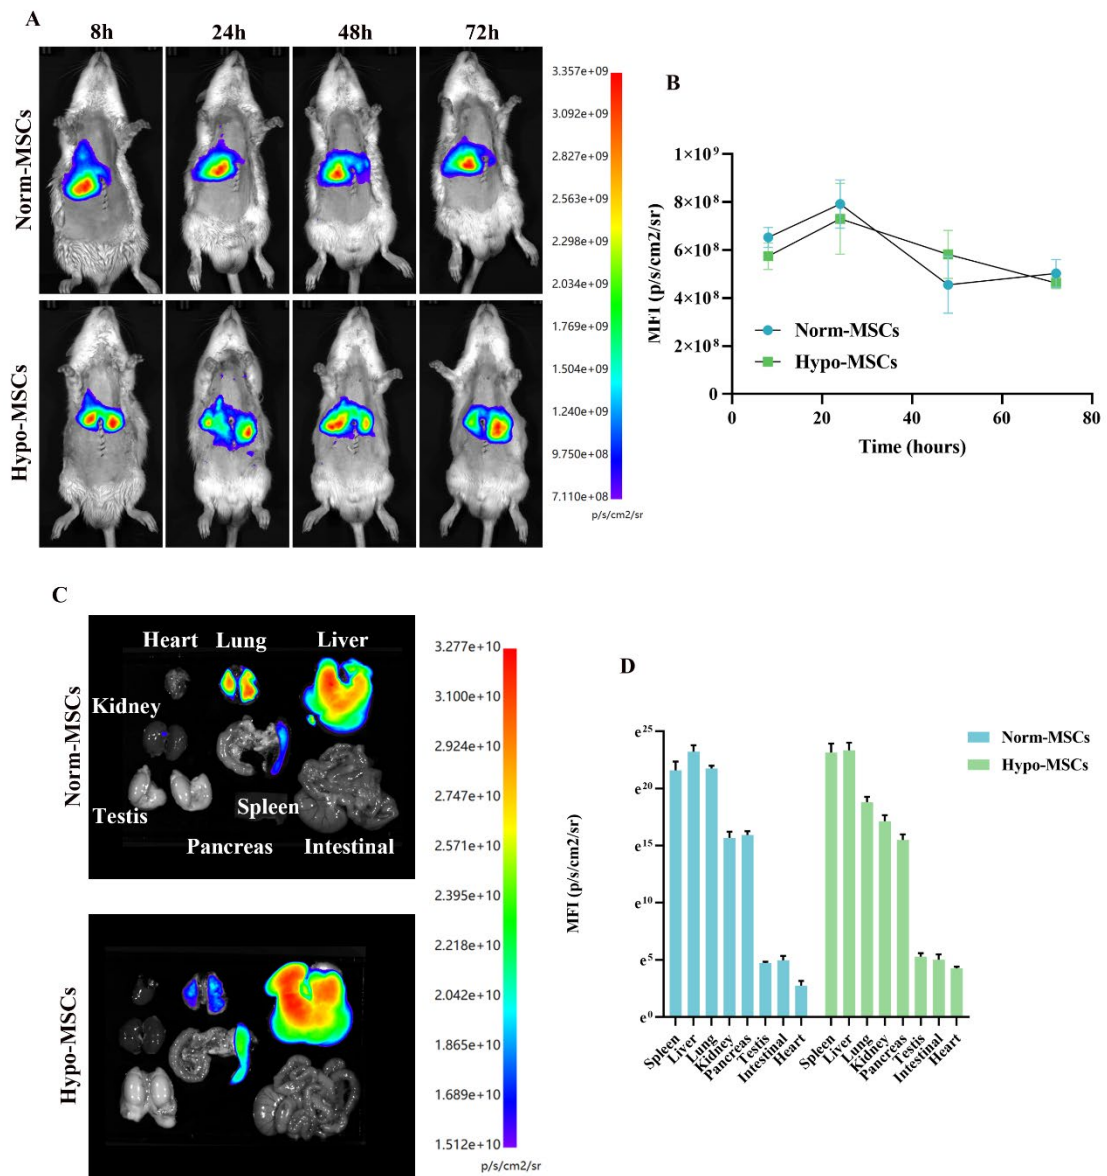

**Figure S2. Tracking the distribution of hUC-MSCs injected into rats via the tail vein.** A-B) The results of in vivo imaging show a gradual accumulation of DiR-labelled hMSCs in the liver and spleen (A). Quantitative analysis of fluorescence intensity showed a peak at 24 hours post-injection, followed by a gradual decrease (B). C, D) Detection and quantification of autofluorescence in heart, liver, kidney, pancreas, spleen, testis and intestinal ducts of rats.

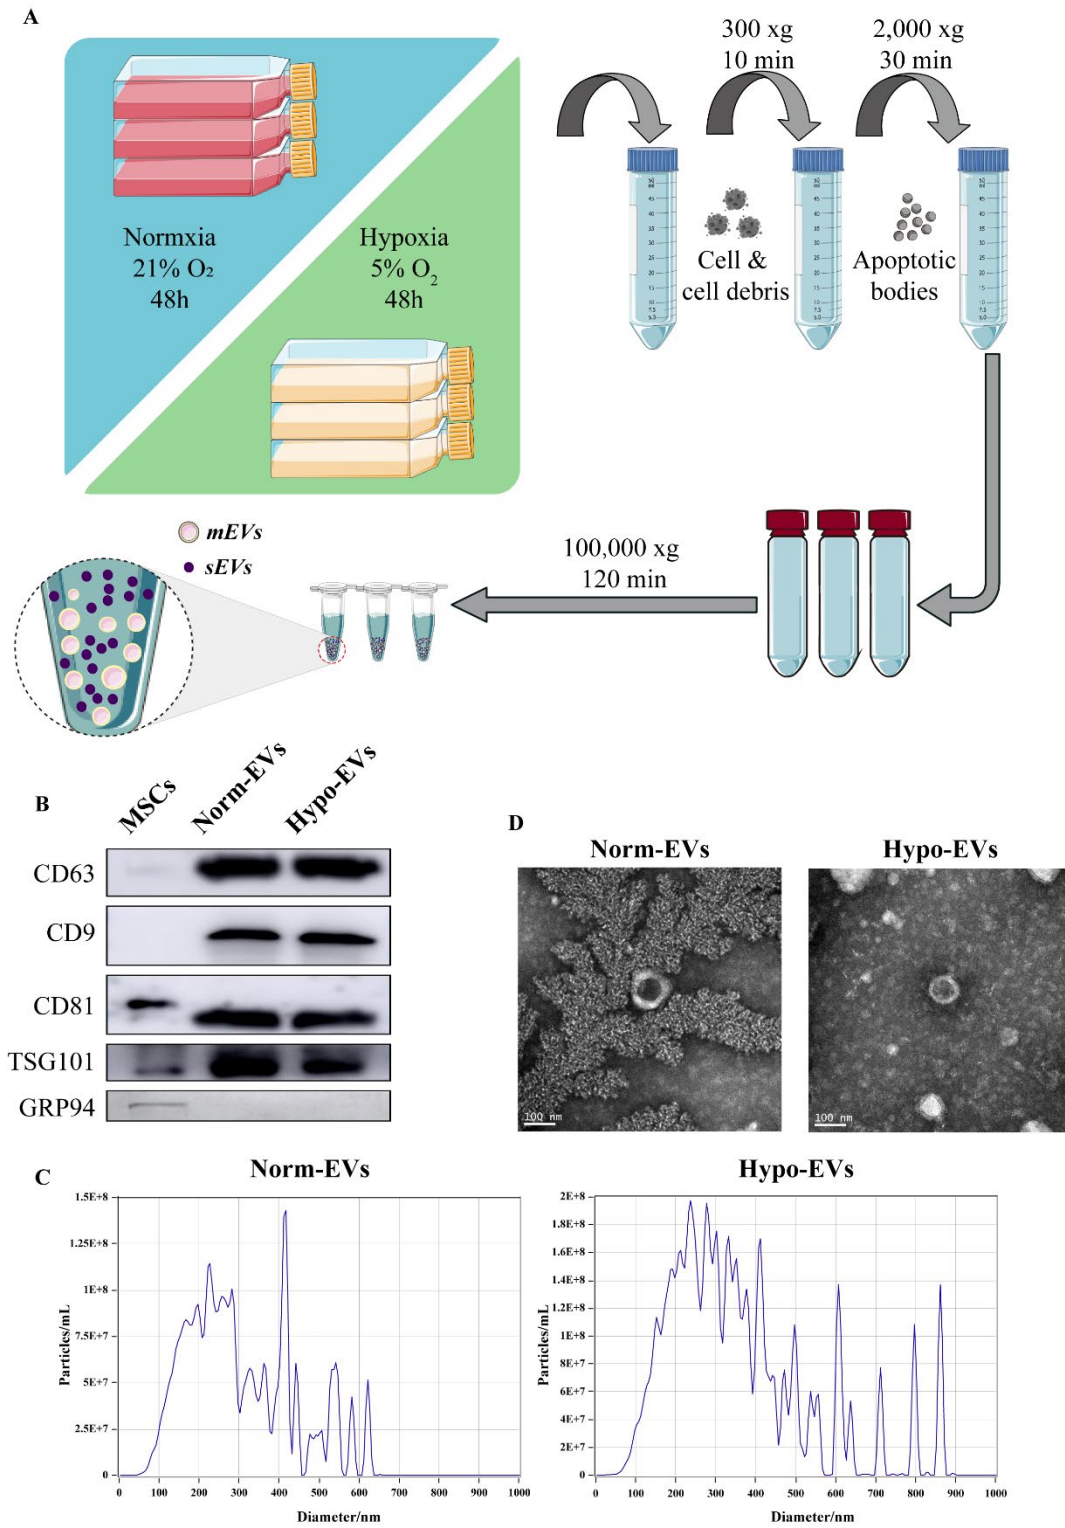

**Figure S3. Separation and characterization of hUC-MSC-derived EVs.** A) Schematic depicting the workflow used to separate the conditioned medium (CM) and the different secretome fractions. B) Western blotting analysis of EVs' markers. C) Representative histograms showing the size distribution by NTA analysis of purified EVs. D) Representative TEM images of separated EVs.

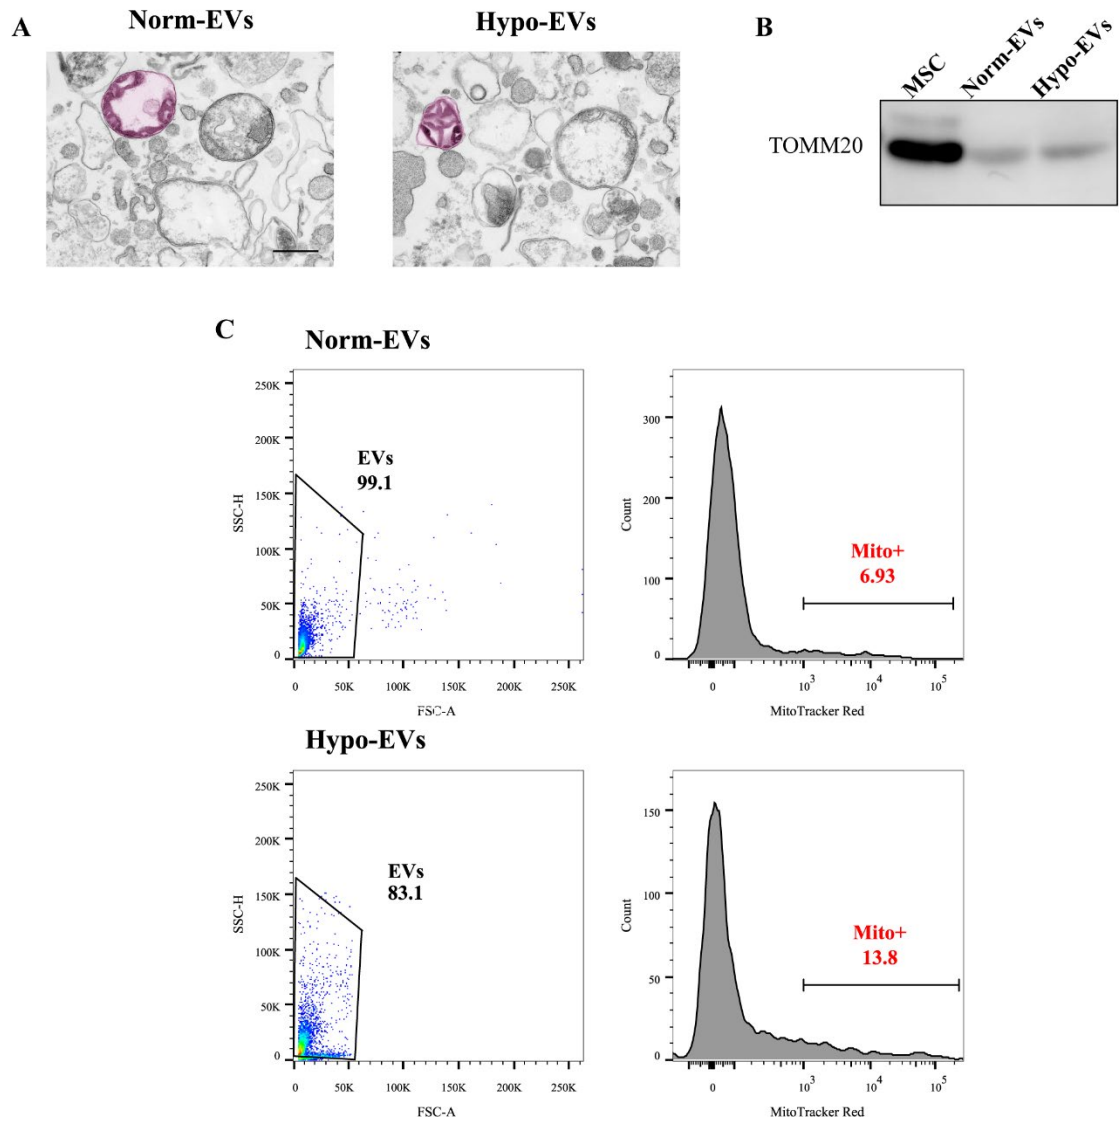

**Figure S4. Characterization of mitochondria in MSC-EVs.** A) Representative transmission electron microscopy (TEM) images showing: EVs contain mitochondria like structures, scale bar: 500 nm. B) WB detected mitochondrial marker TOM20 expression in Norm-EVs and Hypo-EVs lysates. C) The isolated EVs and exosomal mitochondria were characterized using FACS flow cytometry.

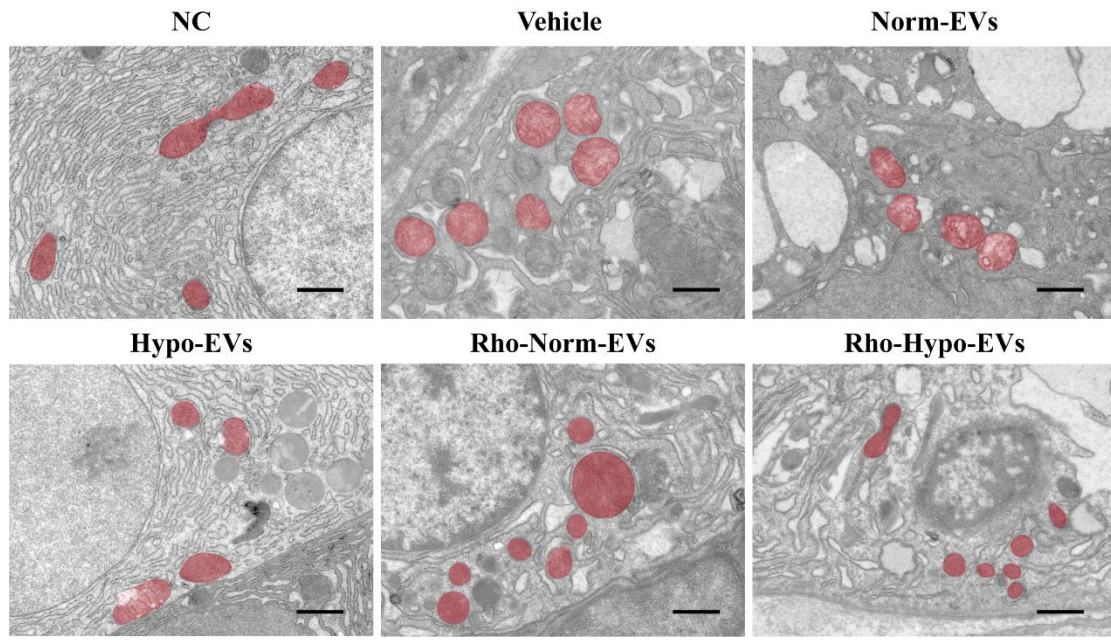

**Figure S5. Representative TEM images of mitochondria in normal control and differently treated PACs, Scale bar, 1 μm.**

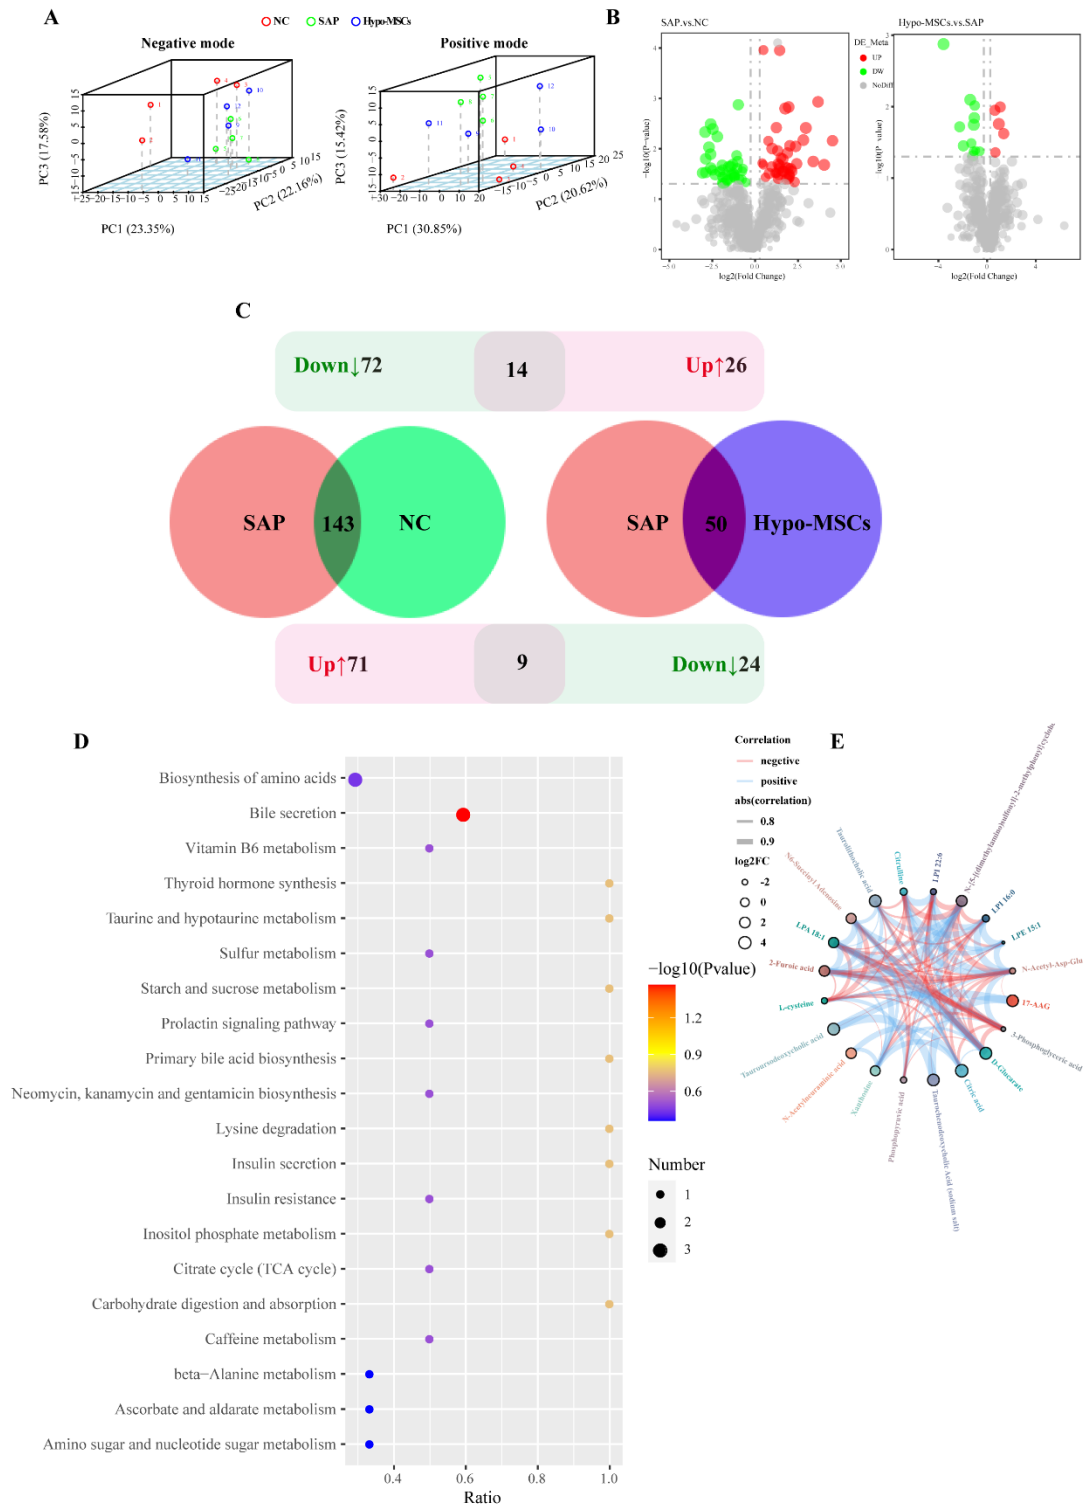



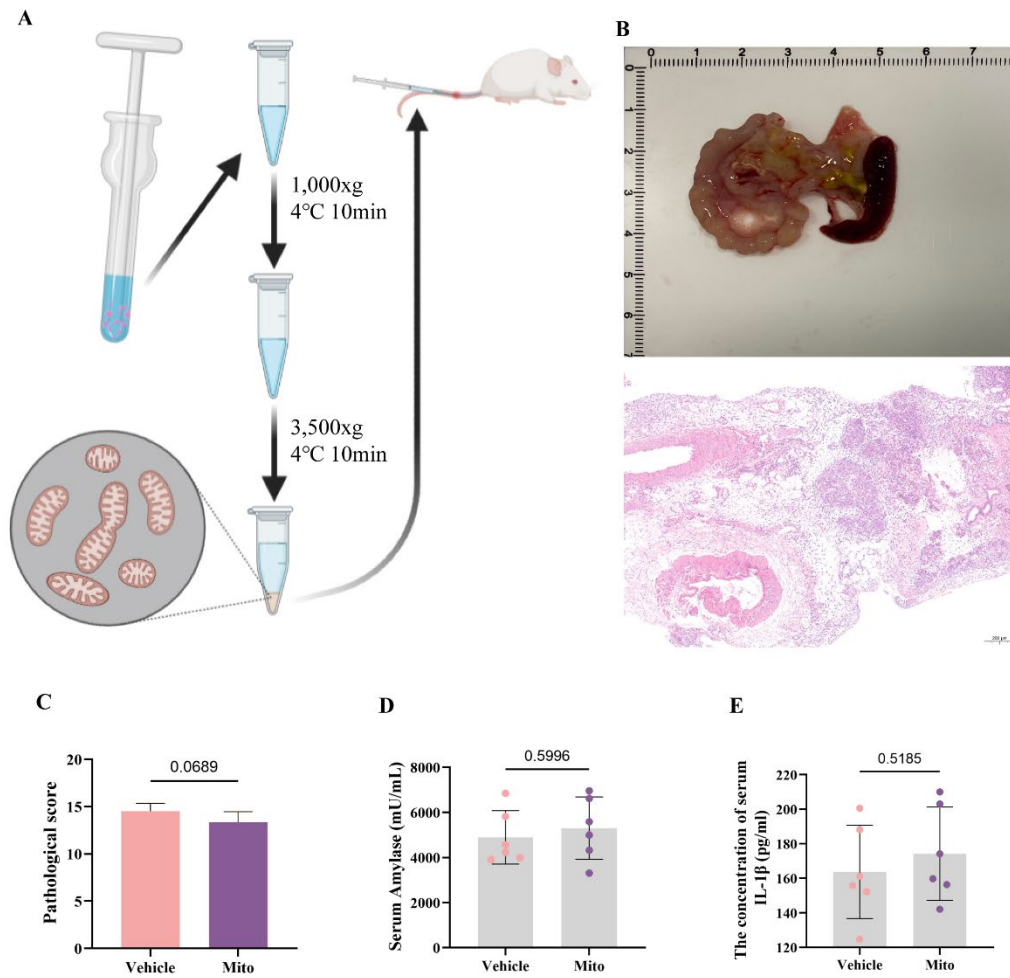

**Figure S7. Purified mitochondria for SAP treatment.** A) Schematic depicting the workflow used to separate the mitochondria. B) Representative images of pancreatic tissue and HE staining after mitochondrial treatment for SAP. C-E) Comparison of pathology scores (C), serum amylase (D) and IL-1 $\beta$  (E) between mitochondrial treatment and vehicle control group.

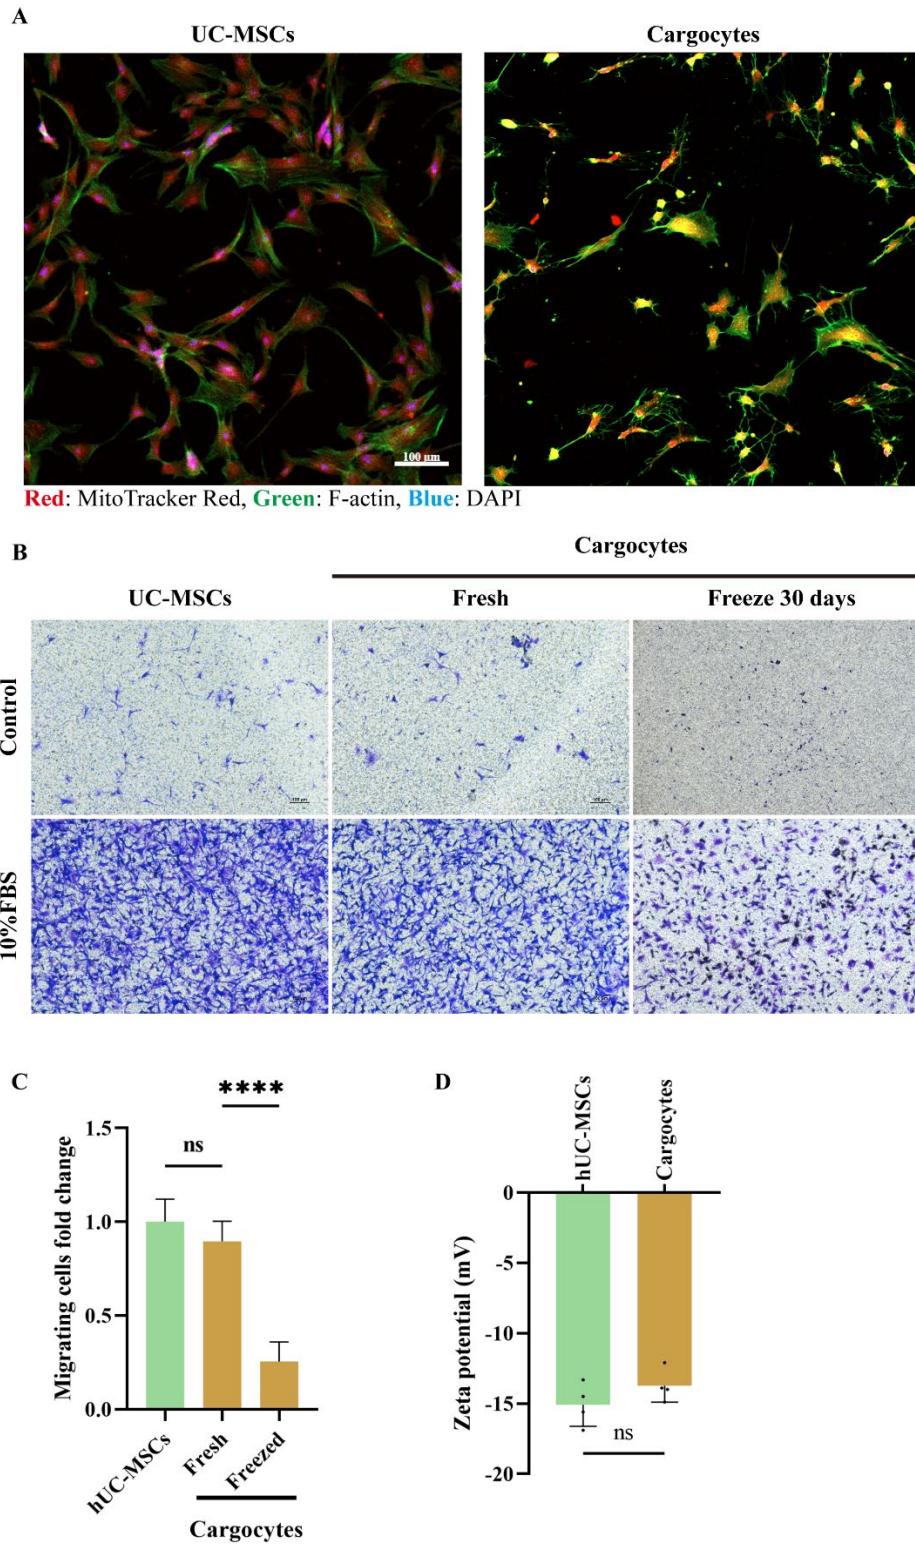

**Figure S8. Cargocytes in vitro functional assay.** A) Adherent state of Cargocytes (right panel) compared to UC-MSCs (left panel). Scale bar, 100 $\mu$ m. B) MSCs/Cargocytes migrated in Transwell chambers towards FBS (Fetal bovine serum) gradients for 2hr. Representative brightfield images of MSCs or Cargocytes that migrated to the underside of 8.0 $\mu$ m porous filters were stained with Crystal Violet. Scale bar, 100 $\mu$ m. C) Bar graphs represent the fold change of the migrating cells number (relative to UC-MSCs). D) Bar graph shows the zeta potential of EVs from MSCs or Cargocytes.

**Table S1. Histological scoring for SAP.**

| Scores | Edema                                    | Inflammatory cellular infiltration | Vacuolization   | Necrosis                            |
|--------|------------------------------------------|------------------------------------|-----------------|-------------------------------------|
| 0      | absent                                   | absent                             | absent          | absent                              |
| 1      | diffuse expansion of interlobar septa    | around ductal margin               | periductal, <5% | 1–4 necrotic cells/HPF <sup>a</sup> |
| 2      | diffuse expansion of interlobular septa  | in parenchyma, < 50% of lobules;   | focal, 5–20%    | 5–10 necrotic cells/HPF             |
| 3      | diffuse expansion of interacinar septa   | in parenchyma, 50–75% of lobules   | diffuse, 21–0%  | 11–15 necrotic cells/HPF            |
| 4      | diffuse expansion of intercellular septa | in parenchyma, >75% of lobules     | severe, >50%    | ≥16 necrotic cells/HPF              |

<sup>a</sup> HPF: high-power field.

**Table S2. Antibody details**

| <b>Name</b>                                       | <b>Cat No.</b> | <b>Company</b> | <b>Dilutions</b> |
|---------------------------------------------------|----------------|----------------|------------------|
| <b>Primary antibodies</b>                         |                |                |                  |
| $\beta$ -Actin                                    | P30002         | Abmart         | 1:10000          |
| NF $\kappa$ B (p65)                               | #8242          | CST            | 1:1000           |
| p-NF $\kappa$ B (p-p65)                           | #3036          | CST            | 1:1000           |
| CD63                                              | M051014        | Abmart         | 1:1000           |
| CD9                                               | T55337         | Abmart         | 1:1000           |
| CD81                                              | T55742         | Abmart         | 1:1000           |
| TSG101                                            | T55985         | Abmart         | 1:1000           |
| GRP94                                             | 60012-2-Ig     | Proteintech    | 1:1000           |
| TOMM20                                            | 11802-1-AP     | Proteintech    | 1:1000           |
| P62                                               | #39749         | CST            | 1:1000           |
| LCIII A/B                                         | #4108          | CST            | 1:1000           |
| CHOP                                              | #2895          | CST            | 1:1000           |
| XBP1s                                             | #40435         | CST            | 1:1000           |
| HIF-1 $\alpha$                                    | NB100-105      | NOVUS          | 1:1000           |
| BNIP3                                             | #44060         | CST            | 1:1000           |
| BNIP3L/NIX                                        | #12396         | CST            | 1:1000           |
| OXPPOS cocktail                                   | 45-8099        | Invitrogen     | 1:1000           |
| PKM1/2                                            | #3190          | CST            | 1:1000           |
| p-PKM                                             | #3827          | CST            | 1:1000           |
| HK2                                               | #              | CST            | 1:1000           |
| MPO                                               | AF7494         | Beyotime       | 1:500            |
| HMGB1                                             | T55060         | Abmart         | 1:100            |
| TOMM20                                            | CL594-66777    | Proteintech    | 1:100            |
| Amylase                                           | 66133-1-Ig     | Proteintech    | 1:100            |
| DAPI                                              | C1002          | Beyotime       | 1:1000           |
| <b>Secondary-antibodies</b>                       |                |                |                  |
| 800CW Goat anti-Rabbit IgG                        | 926-32211      | LI-COR         | 1:1000           |
| 800CW Goat anti-Mouse IgG                         | 926-32210      | LI-COR         | 1:1000           |
| HRP-conjugated Affinipure<br>Goat Anti-Rabbit IgG | SA00001-2      | Proteintech    | 1:1000           |
| HRP-conjugated Affinipure<br>Goat Anti-Mouse IgG  | SA00001-1      | Proteintech    | 1:1000           |
| Goat Anti-Rabbit IgG AF 594                       | M21014         | Abmart         | 1:1000           |
| Goat Anti-Mouse IgG AF 488                        | M21011         | Abmart         | 1:1000           |
